# Supplementary material for: Edible Plant Extracts against Aedes aegypti and Validation of a Piper nigrum L. Ethanolic Extract as a Natural Insecticide
Source: MDPI journal article supplement (doi:10.3390/molecules28031264), 2023-01-28
Supplement: s1 [file s1]

# Edible plant extracts against *Aedes aegypti* and validation of a *Piper nigrum* L. ethanolic extract as a natural insecticide

Lais Silva Morais<sup>1</sup>, João Paulo Barreto Sousa<sup>1</sup>, Carolina Melo Aguiar<sup>1</sup>, Ciro Martins Gomes<sup>2</sup>, Daniel Pecoraro Demarque<sup>1,3</sup>, Lorena Carneiro Albernaz<sup>1</sup> and Laila Salmen Espindola<sup>1\*</sup>

<sup>1</sup> Laboratório de Farmacognosia, Universidade de Brasília, Campus Universitário Darcy Ribeiro, Asa Norte, Brasília, CEP 70910-900, DF, Brazil

<sup>2</sup> Programa de Pós-Graduação em Ciências Médicas, Faculdade de Medicina, Universidade de Brasília, Campus Universitário Darcy Ribeiro, Asa Norte, Brasília, CEP 70910-900, DF, Brazil

<sup>3</sup> Laboratório de Farmacognosia, Faculdade de Ciências Farmacêuticas, Universidade de São Paulo, Av. Professor Lineu Prestes, 580, São Paulo, CEP 05508-900, SP, Brazil

\* Corresponding author: darvenne@unb.br (L. S. Espindola)

**Abstract:** The *Aedes aegypti* mosquito significantly impacts public health, with vector control remaining the most efficient means of reducing the number of arboviral disease cases. This study screened the larvicidal and pupicidal activity of common edible plant extracts. *Piper nigrum* L. (black pepper) extract production was optimized using accelerated solvent extraction (ASE) and validated following regulatory requirements using HPLC-PDA analytical methodology to quantify its major component – piperine. Larvicidal activity was determined for the standardized *P. nigrum* fruit ethanol extract (LC<sub>50</sub> 1.1 µg/mL) and piperine standard (LC<sub>50</sub> 19.0 µg/mL). Furthermore, 9-day residual activity was determined for the extract (4 µg/mL) and piperine (60 µg/mL), with daily piperine quantification. Semi-field trials of solid extract formulations demonstrated 24-day activity against *Ae. aegypti* larvae. Thus, the standardized *P. nigrum* extract emerges as a potential candidate for insecticide development to control the arboviral vector.

**Keywords:** *Aedes aegypti*; *Piper nigrum* L.; black pepper; accelerated solvent extraction (ASE); standardized extract; validation

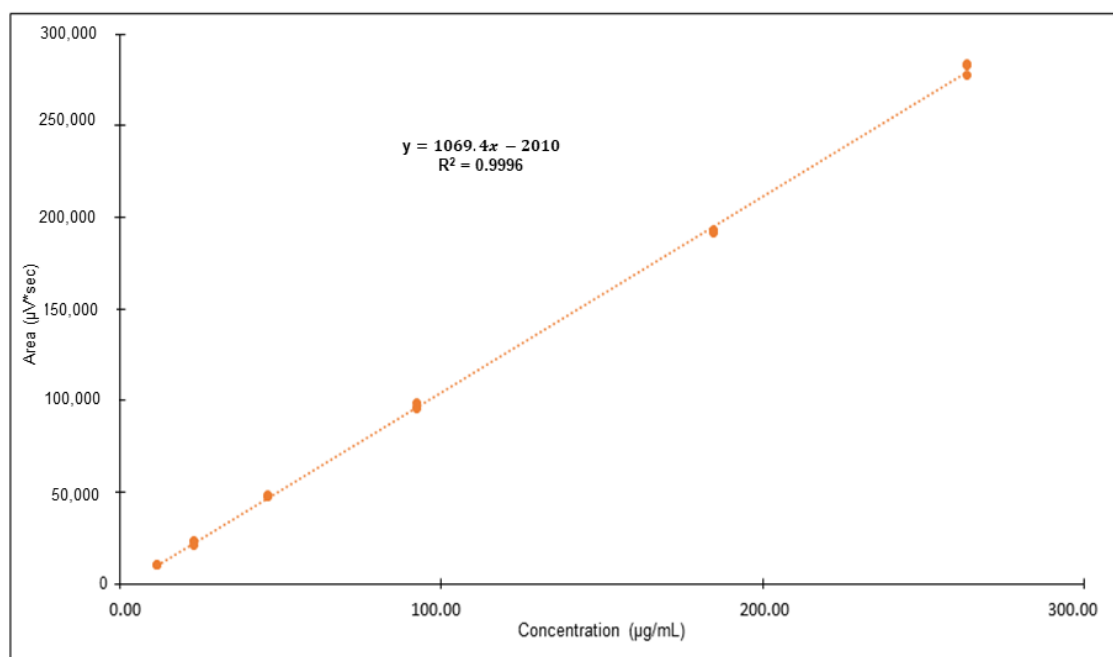

**Figure S1.** Analytical curve of piperine at content level.

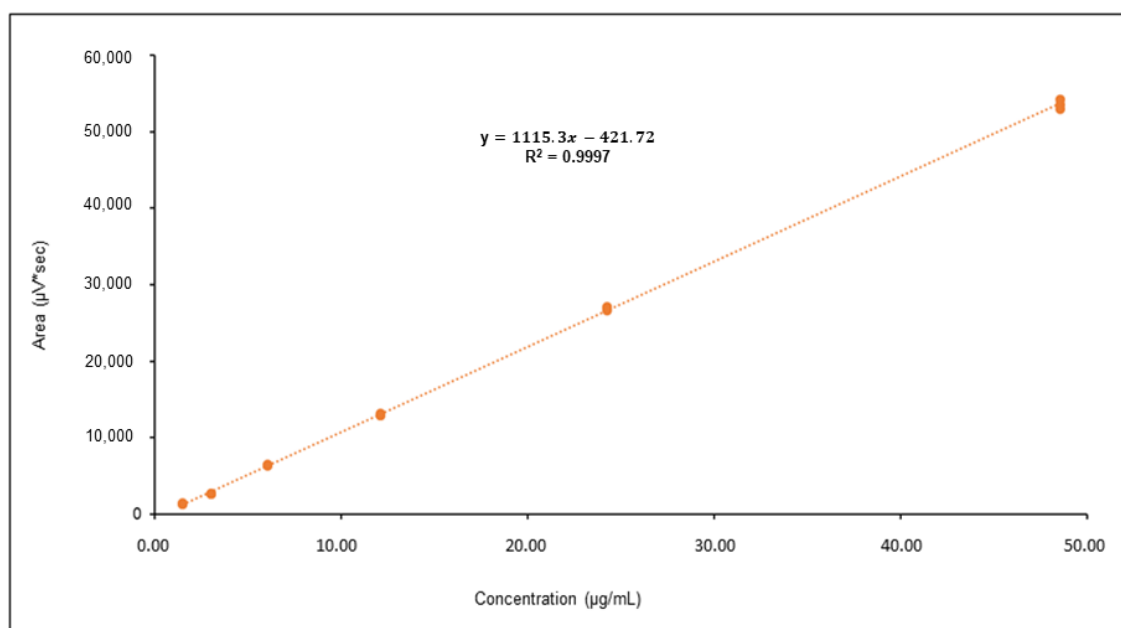

**Figure S2.** Analytical curve of piperine at impurity level.

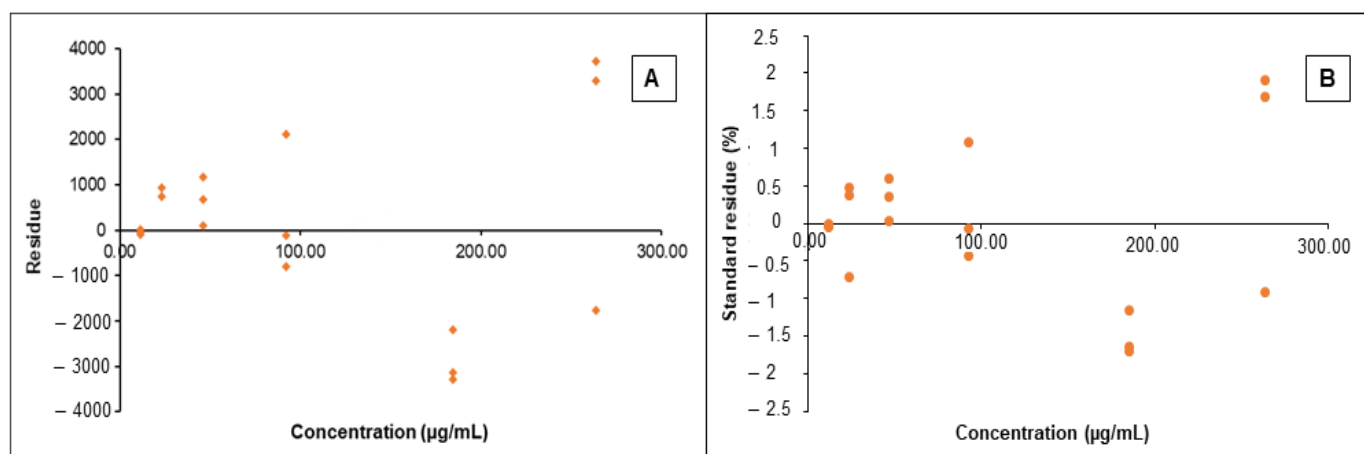

**Figure S3.** Residue plot for linear regression at content level for piperine. **A.** Residue of estimated Y; **B.** Standard residue (%).

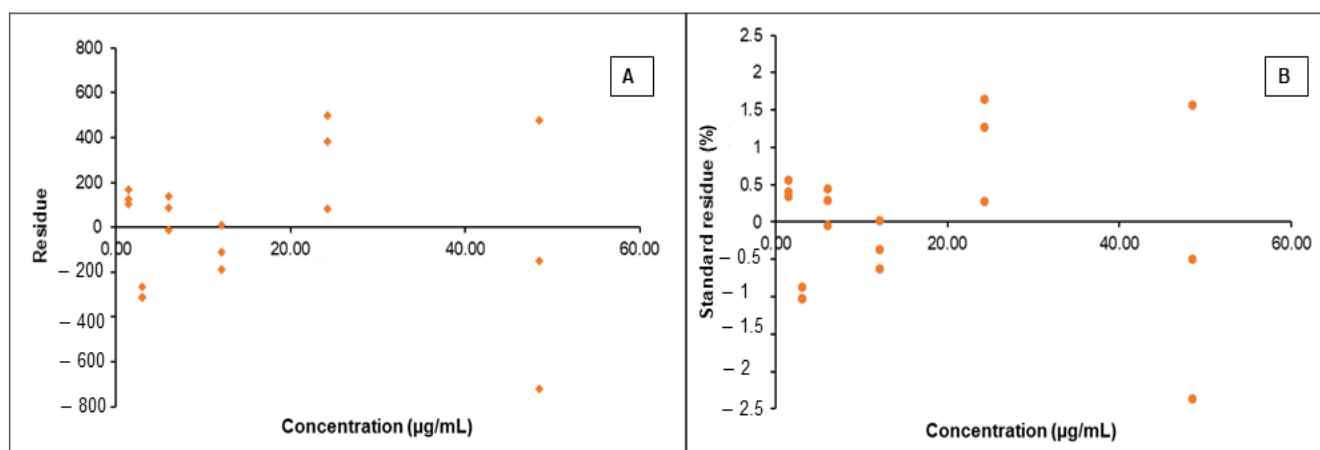

**Figure S4.** Residue plot for linear regression at impurity level for piperine. **A.** Residue of estimated Y; **B.** Standard residue (%).

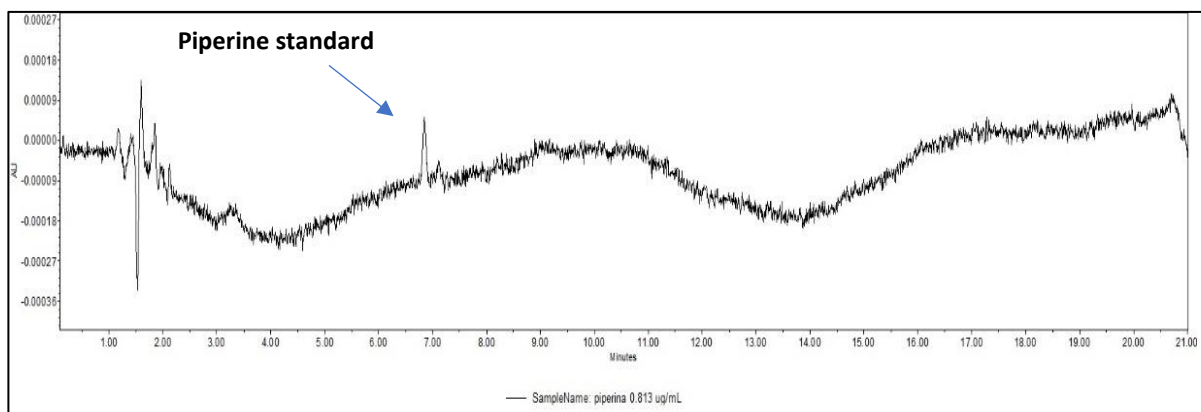

**Figure S5.** Chromatographic profile of piperine at 0.81  $\mu\text{g/mL}$  with a retention time of 6.9 min.

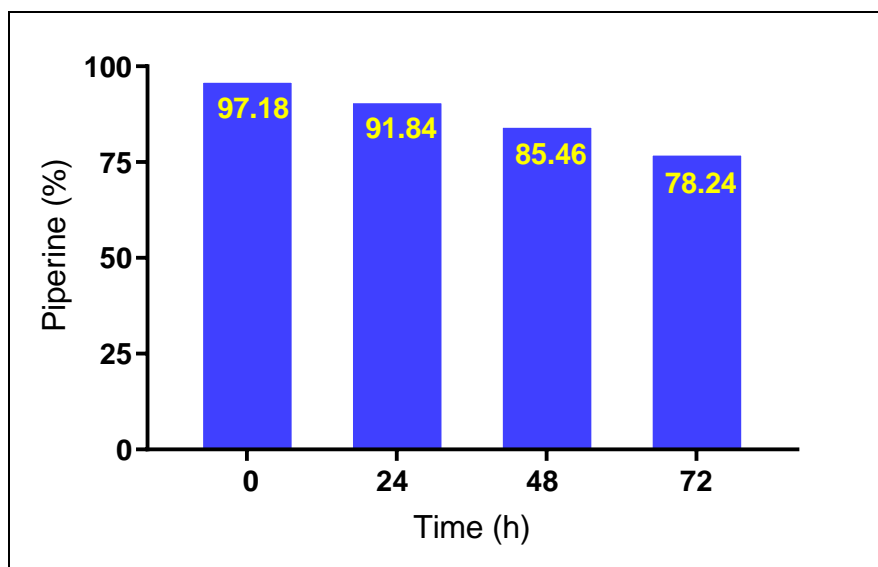

**Figure S6.** Stability considering absolute piperine content over 72 h.

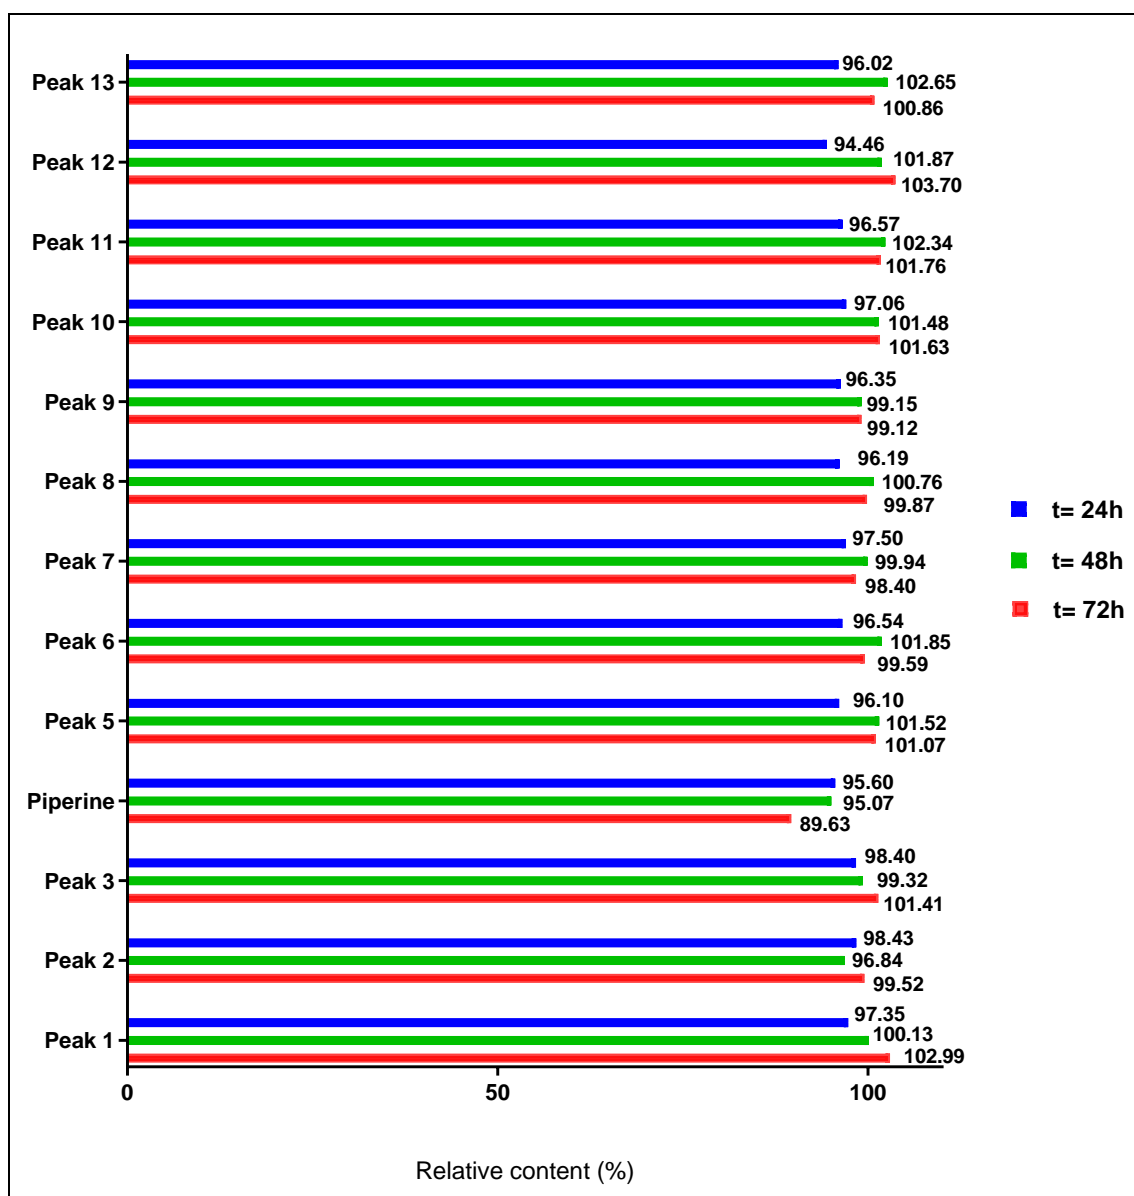

**Figure S7.** Stability considering relative content of 13 studied peaks of *Piper nigrum* fruit ethanolic extract.



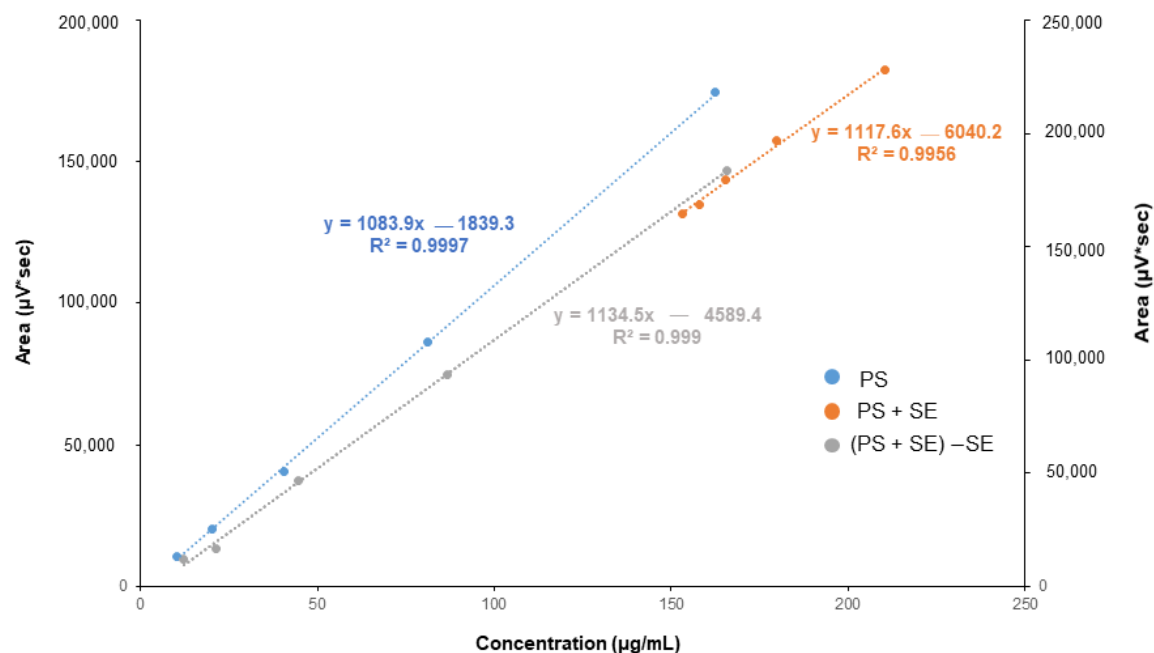

**Figure S8.** Linear regressions for matrix effect determination. PS: Piperine standard; PS+ SE: Piperine standard + Standardized extract of *P. nigrum*; (PS+SE) – IPC: Standardized extract enriched with piperine standardized solution minus initial piperine concentration at standardized extract.

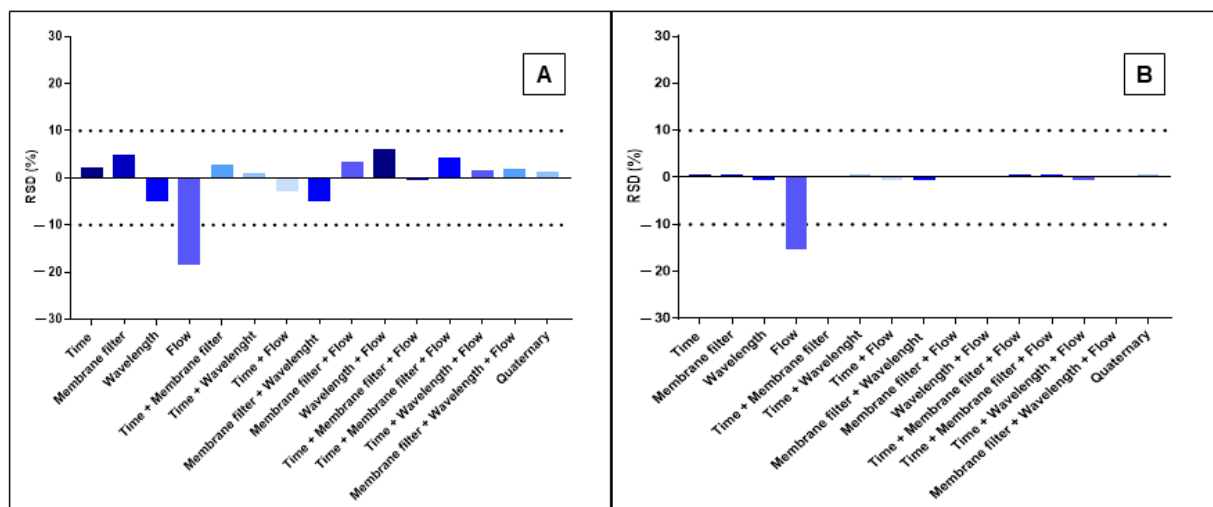

**Figure S9.** Plot for robustness data with RSD (Relative standard deviation) for piperine in the standardized extract. **A)** Robustness for retention time; **B)** Robustness for peak area.

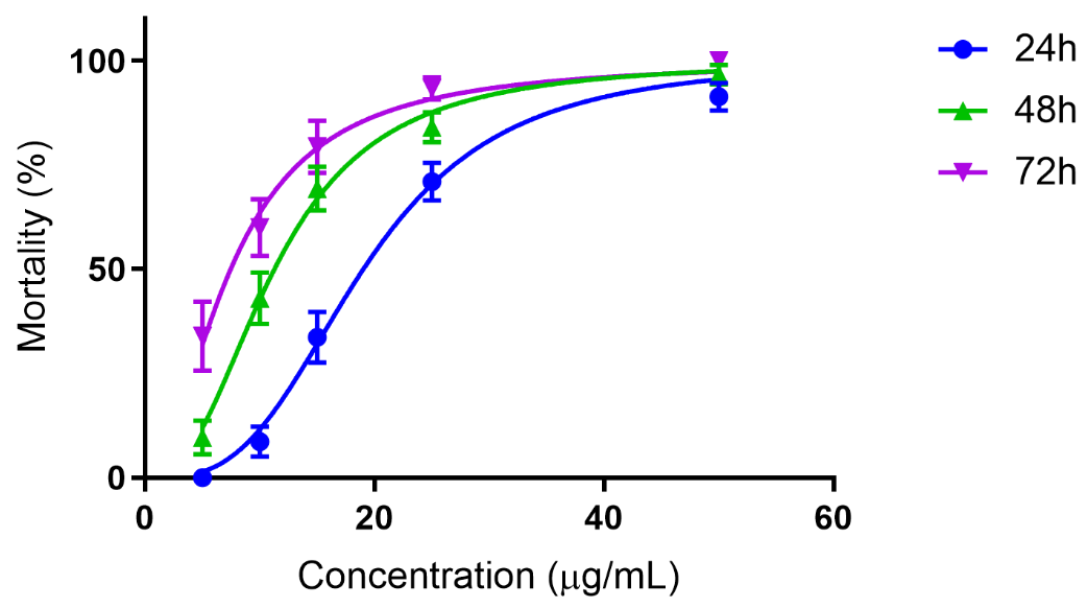

**Figure S10.** Dose-response curve for piperine against *Ae. aegypti* L3 larvae.

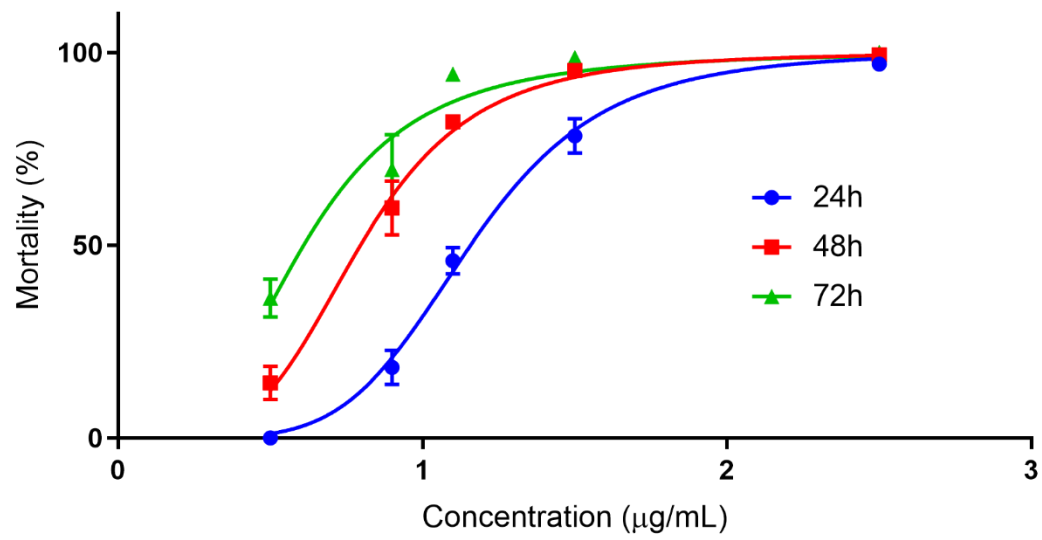

**Figure S1.** Dose-response curve for standardized *P. nigrum* fruit ethanolic extract against *Ae. aegypti* L3 larvae.

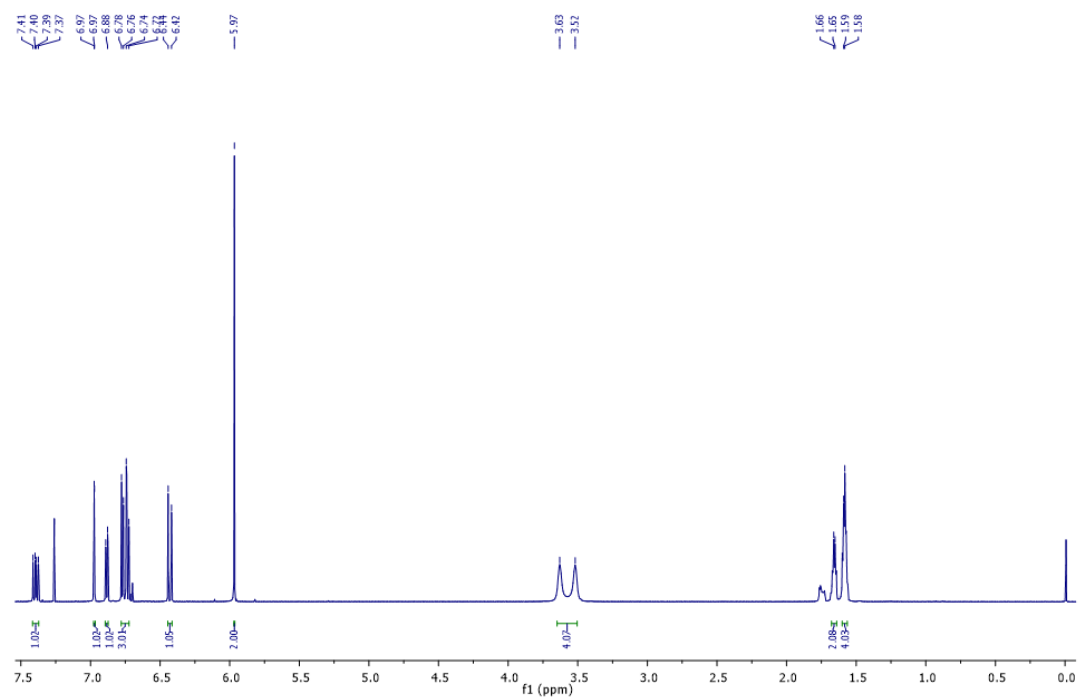

**Figure S22.** <sup>1</sup>H NMR spectrum (600 MHz, CDCl<sub>3</sub>) of isolated piperine.

**Table S1.** Box-Behnken experimental design for *P. nigrum* fruits, including the studied variables, response yields and mortality of *Aedes aegypti* L3 larvae at 1.9 µg/mL. ASE-150® using ethanol.

| Experiment | Time (min.) | Temperature (°C) | Sample (g) | Mortality (%) | Yield (%) |
|------------|-------------|------------------|------------|---------------|-----------|
| A          | 2           | 130              | 3          | 30.8          | 9.1       |
| B          | 3           | 130              | 1          | 61.7          | 9.7       |
| C          | 4           | 50               | 3          | 84.2          | 6.5       |
| D          | 4           | 90               | 1          | 74.2          | 7.1       |
| E          | 4           | 90               | 5          | 78.3          | 7.9       |
| F          | 4           | 50               | 3          | 86.7          | 6.8       |
| G          | 2           | 50               | 3          | 80.8          | 4.9       |
| H          | 3           | 130              | 1          | 78.3          | 9.5       |
| I          | 3           | 130              | 5          | 23.3          | 10.1      |
| J          | 3           | 90               | 3          | 60.8          | 8.9       |
| K          | 2           | 90               | 5          | 53.3          | 11        |
| L          | 3           | 90               | 3          | 88.3          | 7.4       |
| M          | 3           | 90               | 3          | 75            | 7         |
| N          | 2           | 90               | 5          | 86.7          | 6.9       |
| O          | 3           | 50               | 1          | 92.5          | 6.4       |
| P          | 2           | 90               | 1          | 71.7          | 7.7       |
| Q          | 2           | 50               | 3          | 90            | 6.1       |
| R          | 3           | 90               | 3          | 76.7          | 7         |
| S          | 3           | 50               | 5          | 80.8          | 6.2       |
| T          | 4           | 90               | 1          | 70            | 6.8       |
| U          | 2           | 90               | 1          | 52.5          | 7.1       |
| V          | 4           | 130              | 3          | 68.3          | 8.3       |
| W          | 2           | 130              | 3          | 60            | 9.1       |
| X          | 4           | 90               | 5          | 65            | 10.8      |
| Y          | 4           | 130              | 3          | 19.2          | 13        |
| Z          | 3           | 50               | 5          | 82.5          | 6.6       |
| AA         | 3           | 130              | 5          | 67.5          | 8.5       |
| AB         | 3           | 90               | 3          | 61.7          | 7.1       |
| AC         | 3           | 90               | 3          | 43.3          | 10        |
| AD         | 4           | 50               | 1          | 94.2          | 5.9       |

**Table S2.** Selectivity: chromatographic aspects evaluated for each peak (n= 6) of the standardized extraction.

| N° | RT (min) $\pm$ SD | RSD (%) | F $\alpha$ $\pm$ SD | RSD (%) | PH $\pm$ SD     | RSD (%) | PW $\pm$ SD     | RSD (%) |
|----|-------------------|---------|---------------------|---------|-----------------|---------|-----------------|---------|
| PS | 6.87 $\pm$ 0.005  | 0.07    | 1.04 $\pm$ 0.001    | 0.07    | 33280 $\pm$ 216 | 0.65    | 14.2 $\pm$ 0.17 | 1.22    |
| 1  | 5.91 $\pm$ 0.015  | 0.25    | 1.05 $\pm$ 0.0008   | 0.08    | 1173 $\pm$ 36   | 3.06    | 10.4 $\pm$ 0.40 | 3.88    |
| 2  | 6.22 $\pm$ 0.014  | 0.23    | 1.06 $\pm$ 0.0008   | 0.08    | 600 $\pm$ 18    | 2.93    | 10.6 $\pm$ 0.41 | 3.92    |
| 3  | 6.61 $\pm$ 0.015  | 0.22    | 1.05 $\pm$ 0.0003   | 0.03    | 773 $\pm$ 30    | 3.82    | 9.3 $\pm$ 0.29  | 3.10    |
| 4  | 6.93 $\pm$ 0.015  | 0.22    | 1.09 $\pm$ 0.0003   | 0.03    | 35781 $\pm$ 847 | 2.37    | 14.3 $\pm$ 0.20 | 1.42    |
| 5  | 7.58 $\pm$ 0.015  | 0.20    | 1.06 $\pm$ 0.0002   | 0.02    | 4408 $\pm$ 131  | 2.96    | 13.0 $\pm$ 0.48 | 3.71    |
| 6  | 8.04 $\pm$ 0.016  | 0.19    | 1.06 $\pm$ 0.0003   | 0.03    | 1200 $\pm$ 35   | 2.95    | 11.1 $\pm$ 0.48 | 4.35    |
| 7  | 8.53 $\pm$ 0.016  | 0.18    | 1.10 $\pm$ 0.0004   | 0.03    | 4051 $\pm$ 193  | 4.76    | 10.5 $\pm$ 0.41 | 3.86    |
| 8  | 9.36 $\pm$ 0.016  | 0.16    | 1.04 $\pm$ 0.0002   | 0.02    | 2229 $\pm$ 76   | 3.43    | 9.4 $\pm$ 0.25  | 2.68    |
| 9  | 9.78 $\pm$ 0.016  | 0.17    | 1.11 $\pm$ 0.0004   | 0.03    | 4902 $\pm$ 169  | 3.45    | 10.9 $\pm$ 0.39 | 3.60    |
| 10 | 10.88 $\pm$ 0.015 | 0.14    | 1.10 $\pm$ 0.0002   | 0.02    | 3471 $\pm$ 98   | 2.83    | 10.7 $\pm$ 0.50 | 4.72    |
| 11 | 11.99 $\pm$ 0.017 | 0.14    | 1.06 $\pm$ 0.0006   | 0.06    | 3822 $\pm$ 129  | 3.37    | 16.5 $\pm$ 0.50 | 3.04    |
| 12 | 12.75 $\pm$ 0.019 | 0.15    | 1.03 $\pm$ 0.0004   | 0.04    | 1467 $\pm$ 54   | 3.66    | 13.9 $\pm$ 0.35 | 2.48    |
| 13 | 13.15 $\pm$ 0.019 | 0.14    | 1.10 $\pm$ 0.0010   | 0.09    | 2514 $\pm$ 101  | 4.01    | 17.3 $\pm$ 0.70 | 4.04    |

N°: peak number; PS: piperine standard; RT: retention time; F $\alpha$ : factor of separation; PH: peak height; PW: peak width (sec); SD: standard deviation; RSD: relative standard deviation (%).

**Table S3.** Chromatographic variables evaluated for analytical curve of content level in triplicate, for piperine.

| Level           | Curve   | RT (min) | Area   | PH    |
|-----------------|---------|----------|--------|-------|
| 1 (263.6 µg/mL) | 1       | 6.88     | 283617 | 61605 |
|                 | 2       | 6.87     | 278136 | 60985 |
|                 | 3       | 6.89     | 283183 | 61454 |
|                 | mean    | 6.88     | 281645 | 61348 |
|                 | SD      | 0.010    | 3047   | 323   |
|                 | RSD (%) | 0.14     | 1.08   | 0.53  |
| 2 (184.5 µg/mL) | 1       | 6.89     | 192047 | 42429 |
|                 | 2       | 6.89     | 192184 | 42570 |
|                 | 3       | 6.89     | 193128 | 42705 |
|                 | mean    | 6.89     | 192453 | 42568 |
|                 | SD      | 0.003    | 589    | 138   |
|                 | RSD (%) | 0.04     | 0.31   | 0.32  |
| 3 (92.3 µg/mL)  | 1       | 6.91     | 98766  | 21108 |
|                 | 2       | 6.90     | 95855  | 20861 |
|                 | 3       | 6.90     | 96544  | 20976 |
|                 | mean    | 6.90     | 97055  | 20982 |
|                 | SD      | 0.002    | 1521   | 124   |
|                 | RSD (%) | 0.03     | 1.57   | 0.59  |
| 4 (46.1 µg/mL)  | 1       | 6.91     | 48503  | 10441 |
|                 | 2       | 6.90     | 48012  | 10387 |
|                 | 3       | 6.90     | 47422  | 10318 |
|                 | mean    | 6.90     | 47979  | 10382 |
|                 | SD      | 0.003    | 541    | 62    |
|                 | RSD (%) | 0.05     | 1.13   | 0.59  |
| 5 (23.1 µg/mL)  | 1       | 6.90     | 23590  | 5122  |
|                 | 2       | 6.91     | 23395  | 5097  |
|                 | 3       | 6.92     | 21304  | 4699  |
|                 | mean    | 6.91     | 22763  | 4973  |
|                 | SD      | 0.004    | 1267   | 237   |
|                 | RSD (%) | 0.06     | 5.57   | 4.77  |
| 6 (11.5 µg/mL)  | 1       | 6.90     | 10242  | 2266  |
|                 | 2       | 6.91     | 10339  | 2274  |
|                 | 3       | 6.91     | 10281  | 2234  |
|                 | mean    | 6.91     | 10287  | 2258  |
|                 | SD      | 0.002    | 49     | 21    |
|                 | RSD (%) | 0.03     | 0.47   | 0.94  |

RT: retention time; PH: peak height; SD: standard deviation; RSD: relative standard deviation (%).



**Table S4.** Chromatographic variables evaluated for analytical curve at impurity level in triplicate for piperine.

| Level          | Curve   | RT (min) | Area  | PH    |
|----------------|---------|----------|-------|-------|
| 1 (48.5 µg/mL) | 1       | 6.90     | 54167 | 11949 |
|                | 2       | 6.95     | 52974 | 11785 |
|                | 3       | 6.92     | 53541 | 11773 |
|                | mean    | 6.92     | 53561 | 11836 |
|                | SD      | 0.027    | 597   | 98    |
|                | RSD (%) | 0.39     | 1.11  | 0.83  |
| 2 (24.3 µg/mL) | 1       | 6.91     | 26719 | 5925  |
|                | 2       | 6.90     | 27134 | 5939  |
|                | 3       | 6.90     | 27018 | 5899  |
|                | mean    | 6.90     | 26957 | 5921  |
|                | SD      | 0.006    | 214   | 20    |
|                | RSD (%) | 0.09     | 0.79  | 0.34  |
| 3 (12.1 µg/mL) | 1       | 6.90     | 12917 | 2852  |
|                | 2       | 6.91     | 12994 | 2833  |
|                | 3       | 6.91     | 13114 | 2828  |
|                | mean    | 6.91     | 13008 | 2838  |
|                | SD      | 0.003    | 99    | 13    |
|                | RSD (%) | 0.04     | 0.76  | 0.45  |
| 4 (6.1 µg/mL)  | 1       | 6.91     | 6330  | 1394  |
|                | 2       | 6.91     | 6431  | 1377  |
|                | 3       | 6.91     | 6479  | 1391  |
|                | mean    | 6.91     | 6413  | 1387  |
|                | SD      | 0.003    | 76    | 9     |
|                | RSD (%) | 0.04     | 1.19  | 0.65  |
| 5 (3.0 µg/mL)  | 1       | 6.92     | 2697  | 595   |
|                | 2       | 6.92     | 2648  | 593   |
|                | 3       | 6.91     | 2649  | 620   |
|                | mean    | 6.92     | 2665  | 603   |
|                | SD      | 0.002    | 28    | 15    |
|                | RSD (%) | 0.03     | 1.05  | 2.5   |
| 6 (1.5 µg/mL)  | 1       | 6.90     | 1439  | 330   |
|                | 2       | 6.91     | 1372  | 310   |
|                | 3       | 6.92     | 1393  | 317   |
|                | mean    | 6.91     | 1401  | 319   |
|                | SD      | 0.008    | 34    | 10    |
|                | RSD (%) | 0.11     | 2.45  | 3.18  |

RT: retention time; PH: peak height; SD: standard deviation; RSD: relative standard deviation (%).

**Table S5.** Residue results described for regression at content level of piperine.

| OBS. | Conc.<br>(µg/mL) | Experimental Y | Estimated Y | Res.  | S.Res . | Residual<br>Rec. (%) | Curve<br>Rec. (%) |
|------|------------------|----------------|-------------|-------|---------|----------------------|-------------------|
| 1    | 263.6            | 283617         | 279897      | 3720  | 1.93    | 98.69                | 101.32            |
| 2    | 263.6            | 278136         | 279897      | -1761 | -0.91   | 100.63               | 99.38             |
| 3    | 263.6            | 283183         | 279897      | 3286  | 1.70    | 98.84                | 101.17            |
| 4    | 184.5            | 192047         | 195325      | -3278 | -1.70   | 101.71               | 98.34             |
| 5    | 184.5            | 192184         | 195325      | -3141 | -1.63   | 101.63               | 98.41             |
| 6    | 184.5            | 193128         | 195325      | -2197 | -1.14   | 101.14               | 98.89             |
| 7    | 92.3             | 98766          | 96657       | 2109  | 1.09    | 97.86                | 102.14            |
| 8    | 92.3             | 95855          | 96657       | -802  | -0.42   | 100.84               | 99.19             |
| 9    | 92.3             | 96544          | 96657       | -113  | -0.06   | 100.12               | 99.89             |
| 10   | 46.1             | 48503          | 47324       | 1179  | 0.61    | 97.57                | 102.40            |
| 11   | 46.1             | 48012          | 47324       | 688   | 0.36    | 98.57                | 101.40            |
| 12   | 46.1             | 47422          | 47324       | 98    | 0.05    | 99.79                | 100.20            |
| 13   | 23.1             | 23590          | 22657       | 933   | 0.48    | 96.04                | 103.79            |
| 14   | 23.1             | 23395          | 22657       | 738   | 0.38    | 96.84                | 103.00            |
| 15   | 23.1             | 21304          | 22657       | -1353 | -0.70   | 106.35               | 94.52             |
| 16   | 11.5             | 10242          | 10323       | -81   | -0.04   | 100.79               | 99.34             |
| 17   | 11.5             | 10339          | 10323       | 16    | 0.01    | 99.85                | 100.13            |
| 18   | 11.5             | 10281          | 10323       | -42   | -0.02   | 100.41               | 99.66             |

OBS.: observations; Conc: concentration; Res: residue; S. Res.: standard residue; Residual Rec.: residual recovery, relation of experimental data and regression in relation of y axis; Curve Rec.: recovery of the regression expressed by X axes.

**Table S6.** Residue results described for regression at impurity level for piperine.

| OBS. | Conc.<br>(µg/mL) | Experimental Y | Estimated Y | Res. | S.Res . | Residual<br>Rec. (%) | Curve<br>Rec. (%) |
|------|------------------|----------------|-------------|------|---------|----------------------|-------------------|
| 1    | 48.5             | 54167          | 53692       | 475  | 1.57    | 99.12                | 100.88            |
| 2    | 48.5             | 52974          | 53692       | -718 | -2.37   | 101.35               | 98.67             |
| 3    | 48.5             | 53541          | 53692       | -151 | -0.5    | 100.28               | 99.72             |
| 4    | 24.3             | 26719          | 26635       | 84   | 0.28    | 99.69                | 100.31            |
| 5    | 24.3             | 27134          | 26635       | 499  | 1.65    | 98.16                | 101.84            |
| 6    | 24.3             | 27018          | 26635       | 383  | 1.26    | 98.58                | 101.41            |
| 7    | 12.1             | 12917          | 13107       | -190 | -0.63   | 101.47               | 98.6              |
| 8    | 12.1             | 12994          | 13107       | -113 | -0.37   | 100.87               | 99.17             |
| 9    | 12.1             | 13114          | 13107       | 7    | 0.02    | 99.94                | 100.05            |
| 10   | 6.1              | 6330           | 6342        | -12  | -0.04   | 100.2                | 99.81             |
| 11   | 6.1              | 6431           | 6342        | 89   | 0.29    | 98.62                | 101.31            |
| 12   | 6.1              | 6479           | 6342        | 137  | 0.45    | 97.89                | 102.02            |
| 13   | 3                | 2697           | 2960        | -263 | -0.87   | 109.77               | 92.21             |
| 14   | 3                | 2648           | 2960        | -312 | -1.03   | 111.8                | 90.76             |
| 15   | 3                | 2649           | 2960        | -311 | -1.03   | 111.75               | 90.79             |
| 16   | 1.5              | 1439           | 1269        | 170  | 0.56    | 88.21                | 110.03            |
| 17   | 1.5              | 1372           | 1269        | 103  | 0.34    | 92.52                | 106.07            |
| 18   | 1.5              | 1393           | 1269        | 124  | 0.41    | 91.12                | 107.31            |

OBS.: observations; Conc: concentration; Res: residue; S. Res.: standard residue; Residual Rec.: residual recovery, relationship of experimental data and regression in relation to the *y* axis; Curve Rec.: recovery of the regression expressed by the *x* axis.

**Table S7.** Analysis of variance (ANOVA) of regression: piperine at content level.

| ANOVA        |             |          |          |            |                |                |
|--------------|-------------|----------|----------|------------|----------------|----------------|
|              | DF          | SS       | MS       | F          | F <sub>s</sub> | F <sub>t</sub> |
| regression   | 1           | 1.73E+11 | 1.73E+11 | 43761      | 6.25392E-29    | 4.49           |
| residue      | 16          | 6.34E+07 | 3.96E+06 |            |                |                |
| Total        | 17          | 1.73E+11 |          |            |                |                |
|              | Coefficient | SD       | Stat t   | P-value    | 95% lower      | 95% upper      |
| intersection | -2010.01    | 707.26   | -2.84    | 0.0118     | -3509.34       | -510.68        |
| inclination  | 1069.45     | 5.11     | 209.19   | 6.2539E-29 | 1058.61        | 1080.29        |

DF: degrees of freedom; SS: sum of squares; MS: mean of squares; F: coefficient of *Fisher* test for analysis of the differences between regression and residue; F<sub>s</sub>: P- value of F test; F<sub>t</sub>: F- table; SD: standard deviation; Stat t: student t test for significance of coefficients; P-value <0.05; 95% lower: lower limit of 95% confidence interval; 95% upper: upper limit of 95% confidence interval.

**Table S8.** Analysis of variance (ANOVA) of the regression: piperine at impurity level.

| ANOVA       |             |            |               |                 |                |                |
|-------------|-------------|------------|---------------|-----------------|----------------|----------------|
|             | DF          | SS         | MS            | F               | F <sub>s</sub> | F <sub>t</sub> |
| regression  | 1           | 6035233961 | 6035233961    | 61886.5         | 3.91E-30       | 4.49           |
| residue     | 16          | 1560335.9  | 97521         |                 |                |                |
| Total       | 17          | 6036794297 |               |                 |                |                |
|             | Coefficient | SD         | Stat <i>t</i> | <i>P</i> -value | 95% Low.       | 95% Upp.       |
| intersction | -421.72     | 102.53     | -4.11         | 0.001           | -639.07        | -204.37        |
| inclination | 1115.28     | 4.48       | 248.77        | 3.90E-30        | 1105.78        | 1124.78        |

DF: degrees of freedom; SS: sum of squares; MS: mean of squares; F: coefficient of *Fisher* test for analysis of the differences between regression and residue; F<sub>s</sub>: P-value of F test; F<sub>t</sub>: F-table; SD: standard deviation; Stat *t*: student *t* test for significance of coefficients; *P*-value: <0.05; 95% lower: lower limit of 95% confidence interval; 95% upper: upper limit of 95% confidence interval.

**Table S9.** Evaluated stability parameters for piperine standard solution (n = 3).

| T (h) | RT $\pm$ SD      | RSD (%) | Peak area $\pm$ SD | RSD (%) |
|-------|------------------|---------|--------------------|---------|
| 0     | 6.88 $\pm$ 0.004 | 0.06    | 168182 $\pm$ 546   | 0.33    |
| 24    | 6.87 $\pm$ 0.001 | 0.02    | 158914 $\pm$ 1707  | 1.07    |
| 48    | 6.86 $\pm$ 0.004 | 0.05    | 147883 $\pm$ 1356  | 0.92    |
| 72    | 6.87 $\pm$ 0.002 | 0.03    | 135387 $\pm$ 382   | 0.28    |

RT: retention time (min); SD: standard deviation; RSD: relative standard deviation; T: exposure time (h).

**Table S10.** Evaluated stability parameters for *P. nigrum* fruit ethanolic extract (n = 3).

| N° | Time (h) | RT $\pm$ SD       | RSD (%) | Peak area $\pm$ SD | RSD (%) |
|----|----------|-------------------|---------|--------------------|---------|
| 1  | 0        | 5.85 $\pm$ 0.003  | 0.05    | 4896 $\pm$ 99      | 2.03    |
|    | 24       | 5.85 $\pm$ 0.006  | 0.11    | 4767 $\pm$ 129     | 2.7     |
|    | 48       | 5.86 $\pm$ 0.005  | 0.08    | 4903 $\pm$ 113     | 2.31    |
|    | 72       | 5.85 $\pm$ 0.003  | 0.06    | 5043 $\pm$ 159     | 3.16    |
| 2  | 0        | 6.16 $\pm$ 0.005  | 0.09    | 2813 $\pm$ 113     | 4.02    |
|    | 24       | 6.16 $\pm$ 0.008  | 0.12    | 2769 $\pm$ 94      | 3.4     |
|    | 48       | 6.17 $\pm$ 0.003  | 0.05    | 2724 $\pm$ 109     | 4.01    |
|    | 72       | 6.16 $\pm$ 0.003  | 0.05    | 2800 $\pm$ 105     | 3.76    |
| 3  | 0        | 6.55 $\pm$ 0.003  | 0.05    | 3074 $\pm$ 60      | 1.95    |
|    | 24       | 6.55 $\pm$ 0.009  | 0.14    | 3025 $\pm$ 85      | 2.8     |
|    | 48       | 6.56 $\pm$ 0.002  | 0.03    | 3053 $\pm$ 150     | 4.93    |
|    | 72       | 6.55 $\pm$ 0.002  | 0.04    | 3117 $\pm$ 100     | 3.21    |
| 4  | 0        | 6.86 $\pm$ 0.003  | 0.05    | 168859 $\pm$ 1219  | 0.72    |
|    | 24       | 6.86 $\pm$ 0.005  | 0.07    | 161430 $\pm$ 1687  | 1.04    |
|    | 48       | 6.88 $\pm$ 0.003  | 0.05    | 160535 $\pm$ 886   | 0.55    |
|    | 72       | 6.87 $\pm$ 0.003  | 0.04    | 151349 $\pm$ 1178  | 0.78    |
| 5  | 0        | 7.52 $\pm$ 0.002  | 0.03    | 18467 $\pm$ 109    | 0.59    |
|    | 24       | 7.52 $\pm$ 0.002  | 0.08    | 17747 $\pm$ 217    | 1.22    |
|    | 48       | 7.52 $\pm$ 0.003  | 0.03    | 18747 $\pm$ 241    | 1.29    |
|    | 72       | 7.52 $\pm$ 0.003  | 0.03    | 18664 $\pm$ 198    | 1.06    |
| 6  | 0        | 7.99 $\pm$ 0.003  | 0.04    | 4564 $\pm$ 31      | 0.68    |
|    | 24       | 7.98 $\pm$ 0.005  | 0.06    | 4406 $\pm$ 87      | 1.97    |
|    | 48       | 7.99 $\pm$ 0.002  | 0.03    | 4648 $\pm$ 49      | 1.05    |
|    | 72       | 7.98 $\pm$ 0.002  | 0.03    | 4545 $\pm$ 98      | 2.15    |
| 7  | 0        | 8.48 $\pm$ 0.003  | 0.03    | 20184 $\pm$ 413    | 2.04    |
|    | 24       | 8.48 $\pm$ 0.005  | 0.06    | 19588 $\pm$ 289    | 1.48    |
|    | 48       | 8.48 $\pm$ 0.005  | 0.06    | 20171 $\pm$ 190    | 0.94    |
|    | 72       | 8.47 $\pm$ 0.003  | 0.03    | 19861 $\pm$ 311    | 1.57    |
| 8  | 0        | 9.31 $\pm$ 0.004  | 0.04    | 8418 $\pm$ 183     | 2.18    |
|    | 24       | 9.31 $\pm$ 0.004  | 0.05    | 8097 $\pm$ 219     | 2.7     |
|    | 48       | 9.31 $\pm$ 0.006  | 0.07    | 8481 $\pm$ 88      | 1.04    |
|    | 72       | 9.30 $\pm$ 0.003  | 0.03    | 8407 $\pm$ 228     | 2.71    |
| 9  | 0        | 9.72 $\pm$ 0.004  | 0.04    | 21940 $\pm$ 278    | 1.27    |
|    | 24       | 9.72 $\pm$ 0.004  | 0.04    | 21139 $\pm$ 262    | 1.24    |
|    | 48       | 9.72 $\pm$ 0.006  | 0.06    | 21754 $\pm$ 149    | 0.68    |
|    | 72       | 9.72 $\pm$ 0.003  | 0.03    | 21748 $\pm$ 759    | 3.49    |
| 10 | 0        | 10.83 $\pm$ 0.002 | 0.02    | 13730 $\pm$ 180    | 1.31    |
|    | 24       | 10.82 $\pm$ 0.006 | 0.06    | 13327 $\pm$ 184    | 1.38    |
|    | 48       | 10.83 $\pm$ 0.006 | 0.05    | 13934 $\pm$ 48     | 0.35    |
|    | 72       | 10.82 $\pm$ 0.001 | 0.01    | 13955 $\pm$ 221    | 1.58    |
| 11 | 0        | 11.93 $\pm$ 0.001 | 0.01    | 22916 $\pm$ 420    | 1.83    |
|    | 24       | 11.92 $\pm$ 0.006 | 0.05    | 22129 $\pm$ 405    | 1.83    |

|    |    |                   |      |                 |      |
|----|----|-------------------|------|-----------------|------|
|    | 48 | $11.93 \pm 0.007$ | 0.06 | $23453 \pm 355$ | 1.52 |
|    | 72 | $11.92 \pm 0.002$ | 0.02 | $23319 \pm 361$ | 1.55 |
| 12 | 0  | $12.69 \pm 0.006$ | 0.05 | $10213 \pm 421$ | 4.12 |
|    | 24 | $12.68 \pm 0.006$ | 0.05 | $9647 \pm 214$  | 2.22 |
|    | 48 | $12.69 \pm 0.007$ | 0.05 | $10403 \pm 142$ | 1.37 |
|    | 72 | $12.68 \pm 0.003$ | 0.02 | $10591 \pm 522$ | 4.93 |
| 13 | 0  | $13.08 \pm 0.007$ | 0.06 | $19214 \pm 329$ | 1.71 |
|    | 24 | $13.07 \pm 0.003$ | 0.02 | $18449 \pm 431$ | 2.34 |
|    | 48 | $13.09 \pm 0.008$ | 0.06 | $19722 \pm 332$ | 1.69 |
|    | 72 | $13.07 \pm 0.005$ | 0.04 | $19379 \pm 340$ | 1.75 |

N°: peak number; RT: retention time; SD: standard deviation; RSD: relative standard deviation.



**Table S11.** Repeatability data: *P. nigrum* fruit ethanolic extract (n=6).

| N° | RT ± SD       | RSD (%) | Peak area ± DP | RSD (%) | TF ± SD       | RSD (%) |
|----|---------------|---------|----------------|---------|---------------|---------|
| 1  | 5.90 ± 0.004  | 0.07    | 5430 ± 199     | 3.67    | 0.12 ± 0.0028 | 2.39    |
| 2  | 6.21 ± 0.004  | 0.06    | 3167 ± 89      | 2.82    | 0.07 ± 0.0016 | 2.31    |
| 3  | 6.60 ± 0.005  | 0.08    | 3402 ± 95      | 2.79    | 0.11 ± 0.0028 | 2.64    |
| 4  | 6.91 ± 0.005  | 0.07    | 169034 ± 4279  | 2.53    | 5.75 ± 0.1401 | 2.43    |
| 5  | 7.55 ± 0.006  | 0.08    | 20417 ± 803    | 3.93    | 0.93 ± 0.0340 | 3.66    |
| 6  | 8.02 ± 0.005  | 0.06    | 4979 ± 137     | 2.76    | 0.30 ± 0.0063 | 2.11    |
| 7  | 8.51 ± 0.004  | 0.05    | 18700 ± 838    | 4.48    | 1.24 ± 0.0677 | 5.47    |
| 8  | 9.34 ± 0.004  | 0.04    | 9326 ± 347     | 3.72    | 0.88 ± 0.0266 | 3.01    |
| 9  | 9.75 ± 0.004  | 0.04    | 24481 ± 895    | 3.65    | 2.28 ± 0.0881 | 3.65    |
| 10 | 10.85 ± 0.004 | 0.03    | 15553 ± 680    | 4.37    | 2.21 ± 0.0881 | 3.99    |
| 11 | 11.95 ± 0.003 | 0.03    | 26559 ± 1067   | 4.02    | 3.27 ± 0.1481 | 4.52    |
| 12 | 12.69 ± 0.005 | 0.04    | 12062 ± 194    | 1.61    | 1.55 ± 0.0359 | 2.31    |
| 13 | 13.08 ± 0.003 | 0.02    | 22277 ± 945    | 4.24    | 2.86 ± 0.1174 | 4.10    |

N°: Peak number; RT: Retention time (min); TF: Tail factor; SD: Standard deviation; RSD: Relative standard deviation.

**Table S12.** Intermediate precision data: *P. nigrum* fruit ethanolic extract (n=6).

| N° | RT ± SD       | RSD (%) | Peak area ± DP | RSD (%) | TF ± SD      | RSD (%) |
|----|---------------|---------|----------------|---------|--------------|---------|
| 1  | 5.90 ± 0.005  | 0.08    | 5357 ± 248     | 4.64    | 0.11 ± 0.005 | 4.16    |
| 2  | 6.21 ± 0.005  | 0.09    | 3121 ± 136     | 4.34    | 0.07 ± 0.004 | 5.70    |
| 3  | 6.59 ± 0.005  | 0.08    | 3336 ± 164     | 4.92    | 0.10 ± 0.004 | 3.85    |
| 4  | 6.91 ± 0.005  | 0.07    | 1690554 ± 6782 | 4.27    | 5.46 ± 0.217 | 4.02    |
| 5  | 7.56 ± 0.005  | 0.07    | 18912 ± 937    | 4.98    | 0.88 ± 0.044 | 5.04    |
| 6  | 8.03 ± 0.005  | 0.07    | 4786 ± 219     | 4.61    | 0.29 ± 0.013 | 4.59    |
| 7  | 8.52 ± 0.005  | 0.06    | 19562 ± 882    | 4.52    | 1.30 ± 0.078 | 6.06    |
| 8  | 9.34 ± 0.005  | 0.05    | 8861 ± 426     | 4.85    | 0.85 ± 0.043 | 5.13    |
| 9  | 9.76 ± 0.005  | 0.05    | 22858 ± 1112   | 4.86    | 2.16 ± 0.116 | 5.39    |
| 10 | 10.85 ± 0.005 | 0.05    | 14425 ± 696    | 4.85    | 2.09 ± 0.117 | 5.61    |
| 11 | 11.95 ± 0.004 | 0.03    | 25800 ± 760    | 2.93    | 3.14 ± 0.185 | 5.95    |
| 12 | 12.70 ± 0.006 | 0.05    | 11904 ± 298    | 2.51    | 1.50 ± 0.072 | 4.87    |
| 13 | 13.09 ± 0.005 | 0.04    | 22148 ± 779    | 3.51    | 2.77 ± 0.164 | 5.97    |

N°: Peak number; RT: Retention time (min); TF: Tail factor; SD: Standard deviation; RSD: Relative standard deviation.

**Table S13.** Data for determination of piperine method accuracy.

| L      | TC<br>(µg/mL) | EC<br>(µg/mL) | Concentration E<br>(µg/mL) | E<br>(%) | Rec<br>(%) | RecM<br>(%) ± SD | RSD<br>(%) |
|--------|---------------|---------------|----------------------------|----------|------------|------------------|------------|
| High   | 228.57        | 221.1         | 7.47                       | 3.27     | 96.73      | 92.73 ± 4.73     | 5.1        |
|        |               | 202.35        | 26.22                      | 11.47    | 88.53      |                  |            |
|        |               | 203.37        | 25.2                       | 11.03    | 88.97      |                  |            |
|        |               | 204.41        | 24.16                      | 10.57    | 89.43      |                  |            |
|        |               | 228.59        | -0.02                      | -0.01    | 100.01     |                  |            |
| Medium | 114.28        | 98.8          | 15.48                      | 13.55    | 86.45      | 88.88 ± 4.23     | 4.76       |
|        |               | 98.65         | 15.63                      | 13.68    | 86.32      |                  |            |
|        |               | 95.78         | 18.5                       | 16.19    | 83.81      |                  |            |
|        |               | 108.11        | 6.17                       | 5.4      | 94.6       |                  |            |
|        |               | 106.51        | 7.77                       | 6.8      | 93.2       |                  |            |
| Low    | 57.14         | 45.81         | 11.33                      | 19.83    | 80.17      | 83.36 ± 4.75     | 5.7        |
|        |               | 44.66         | 12.48                      | 21.84    | 78.16      |                  |            |
|        |               | 52.59         | 4.55                       | 7.96     | 92.04      |                  |            |
|        |               | 47.29         | 9.85                       | 17.24    | 82.76      |                  |            |
|        |               | 47.8          | 9.34                       | 16.35    | 83.65      |                  |            |

L: Level of concentration; TC: Theoretical concentration; EC: Experimental concentration; E: Error; Rec: Recovery; M: Mean; SD: Standard deviation; RSD: Relative standard deviation.

**Table S14.** Normalized matrix effect (NME) data for piperine following the method.

| Curve       | Regression             | $r^2$  | LDR ( $\mu\text{g/mL}$ ) | P | MED              |             |      |            |
|-------------|------------------------|--------|--------------------------|---|------------------|-------------|------|------------|
|             |                        |        |                          |   | M $\pm$ SD<br>AC | RSD<br>AC % | NME  | E%         |
| PS          | $y = 1083.9x - 1839.3$ | 0.9997 | 10.15 - 162.15           | 5 |                  |             |      |            |
| PS+SE       | $y = 1117.6x - 6040.2$ | 0.9956 | 153.02 - 210.56          | 5 | $1100.75 \pm 24$ | 2.16        | 0.97 | $\pm 3.02$ |
| (PS+SE)-IPC | $y = 1134.5x - 4589.4$ | 0.9990 | 12.12 - 165.70           | 5 | $1109.2 \pm 36$  | 3.23        | 0.96 | $\pm 4.46$ |

PS: Piperine standard; PS+ SE: Piperine standard + Standardized extract of *Piper nigrum*; (PS+SE) – IPC: Standardized extract enriched with piperine standardized solution minus Initial piperine concentration present in the standardized extract. LDR: Linear dynamic range; P: Number of curve points; M: Mean; SD: Standard deviation; AC: Angular coefficient; RSD: Relative standard deviation; NME: Normalized matrix effect; E: Error

**Table S15.** Method applicability in different *P. nigrum* fruit samples.

| Provider | Batch number | RT $\pm$ SD       | RSD   | AREA $\pm$ SD     | RSD  | Content % |
|----------|--------------|-------------------|-------|-------------------|------|-----------|
| RP       | PNB-31102020 | 6.914 $\pm$ 0.011 | 0.165 | 124125 $\pm$ 8004 | 6.45 | 2.0       |
| RC       | PNB-OO8R     | 6.912 $\pm$ 0.004 | 0.052 | 115555 $\pm$ 3777 | 3.27 | 2.0       |
| TC       | PNB-14921    | 6.909 $\pm$ 0.006 | 0.086 | 96426 $\pm$ 2696  | 2.8  | 1.6       |
| CF       | PNB-70926    | 6.902 $\pm$ 0.019 | 0.276 | 96046 $\pm$ 6863  | 7.15 | 1.6       |
| CTFG     | PNB-30102020 | 6.894 $\pm$ 0.001 | 0.021 | 115941 $\pm$ 3533 | 3.05 | 1.9       |
| CDQ      | PNW-341      | 6.899 $\pm$ 0.004 | 0.064 | 141792 $\pm$ 6411 | 4.52 | 2.3       |
| RP       | PNW-30102020 | 6.908 $\pm$ 0.003 | 0.04  | 99920 $\pm$ 1134  | 1.13 | 1.7       |
| TC       | PNW-14921    | 6.925 $\pm$ 0.022 | 0.325 | 127618 $\pm$ 2119 | 1.66 | 2.1       |
| CTFG     | PNW-31102020 | 6.932 $\pm$ 0.002 | 0.032 | 130894 $\pm$ 9520 | 7.27 | 2.2       |
| BM       | PNW-32102020 | 6.927 $\pm$ 0.005 | 0.072 | 152313 $\pm$ 6150 | 4.04 | 2.5       |

RP: *Rei das Pimentas*; RC: *Rei dos condimentos*; TC: *Temperos e Cia*; CF: *Carrefour*; CTFG: *Casa de temperos Feira do Guará*; CDQ: *Casa de Doces e queijos*; BM: *Biomundo*; PNP: *Piper nigrum* black; PNW: *Piper nigrum* white; RT: Retention time; SD: Standard deviation; RSD: Relative standard deviation.

**Table S16.** Mortality of *Ae. aegypti* L3 larvae exposed to formulations of *P. nigrum* fruit ethanolic extracts at small-scale field trial.

| Day | Mortality (mean, %) |      |      |      |         |      |       |      |          |      |       |      |
|-----|---------------------|------|------|------|---------|------|-------|------|----------|------|-------|------|
|     | 2.5 µg/mL           |      |      |      | 5 µg/mL |      |       |      | 10 µg/mL |      |       |      |
|     | ASE                 |      | UAM  |      | ASE     |      | UAM   |      | ASE      |      | UAM   |      |
|     | Mean                | SD   | Mean | SD   | Mean    | SD   | Mean  | SD   | Mean     | SD   | Mean  | SD   |
| 1   | 100                 | 0.0  | 100  | 0.0  | 100.0   | 0.0  | 100.0 | 0.0  | 100.0    | 0.0  | 100.0 | 0.0  |
| 2   | 99.5                | 0.7  | 97   | 1.4  | 100.0   | 0.0  | 98.5  | 0.7  | 100.0    | 0.0  | 99.5  | 0.7  |
| 3   | 95.5                | 2.1  | 92.5 | 7.8  | 97.0    | 1.4  | 95.5  | 0.7  | 99.0     | 1.4  | 99.5  | 0.7  |
| 4   | 82                  | 2.8  | 79.5 | 2.1  | 94.0    | 1.4  | 91.0  | 1.4  | 98.5     | 0.7  | 98.0  | 1.4  |
| 5   | 53                  | 15.6 | 60   | 21.2 | 88.0    | 14.1 | 78.5  | 9.2  | 95.5     | 0.7  | 97.0  | 1.4  |
| 6   | 36                  | 15.6 | 13   | 11.3 | 67.5    | 6.4  | 52.5  | 30.4 | 96.0     | 2.8  | 91.5  | 0.7  |
| 7   | 12.5                | 12.0 | 12.5 | 9.2  | 52.5    | 10.6 | 19.5  | 4.9  | 93.5     | 4.9  | 97.5  | 3.5  |
| 8   | -                   | -    | -    | -    | -       | -    | -     | -    | 94.5     | 0.7  | 83.5  | 3.5  |
| 9   | -                   | -    | -    | -    | -       | -    | -     | -    | 82.5     | 6.4  | 83.5  | 3.5  |
| 10  | -                   | -    | -    | -    | -       | -    | -     | -    | 85.5     | 4.9  | 61.0  | 8.5  |
| 11  | -                   | -    | -    | -    | -       | -    | -     | -    | 82.5     | 3.5  | 71.0  | 9.9  |
| 12  | -                   | -    | -    | -    | -       | -    | -     | -    | 82.0     | 5.7  | 80.5  | 0.7  |
| 13  | -                   | -    | -    | -    | -       | -    | -     | -    | 80.0     | 0.0  | 80.5  | 2.1  |
| 14  | -                   | -    | -    | -    | -       | -    | -     | -    | 78.5     | 9.2  | 79.5  | 2.1  |
| 15  | -                   | -    | -    | -    | -       | -    | -     | -    | 83.0     | 11.3 | 86.5  | 0.7  |
| 16  | -                   | -    | -    | -    | -       | -    | -     | -    | 92.5     | 6.4  | 96.5  | 0.7  |
| 17  | -                   | -    | -    | -    | -       | -    | -     | -    | 79.5     | 4.9  | 83.0  | 8.5  |
| 18  | -                   | -    | -    | -    | -       | -    | -     | -    | 90.0     | 8.5  | 86.5  | 7.8  |
| 19  | -                   | -    | -    | -    | -       | -    | -     | -    | 86.5     | 3.5  | 82.5  | 6.4  |
| 20  | -                   | -    | -    | -    | -       | -    | -     | -    | 85.0     | 2.8  | 82.0  | 11.3 |
| 21  | -                   | -    | -    | -    | -       | -    | -     | -    | 63.5     | 0.7  | 64.0  | 1.4  |
| 22  | -                   | -    | -    | -    | -       | -    | -     | -    | 65.0     | 1.4  | 58.5  | 16.3 |
| 23  | -                   | -    | -    | -    | -       | -    | -     | -    | 62.5     | 3.5  | 67.5  | 2.1  |
| 24  | -                   | -    | -    | -    | -       | -    | -     | -    | 44.0     | 5.7  | 42.5  | 2.1  |

UAM: Ultrasound assisted maceration formulation. ASE: ASE standardized formulation. - test halted on Day-7.

**Table S17.** Evaluation of system adequacy, ratio between two standard solutions (P1 and P2) for method development. Error <3 %.

| P1              |          |        |       | P2              |          |        |       | Ratio % |
|-----------------|----------|--------|-------|-----------------|----------|--------|-------|---------|
| Sample analysis | RT (min) | Area   | TF    | Sample analysis | RT (min) | Area   | TF    | 98.74   |
| 1               | 6.85     | 163340 | 10.69 | 1               | 6.86     | 163804 | 10.66 |         |
| 2               | 6.85     | 160543 | 10.55 | 2               | 6.85     | 163722 | 10.59 |         |
| 3               | 6.85     | 160456 | 10.50 | –               | –        | –      | –     |         |
| 4               | 6.86     | 162050 | 10.49 | –               | –        | –      | –     |         |
| 5               | 6.86     | 160388 | 10.49 | –               | –        | –      | –     |         |
| 6               | 6.85     | 162740 | 10.53 | –               | –        | –      | –     |         |
| mean            | 6.85     | 161586 | 10.54 | mean            | 6.86     | 163763 | 10.62 |         |
| SD              | 0.01     | 1298   | 0.08  | SD              | 0.01     | 58     | 0.05  |         |
| RSD (%)         | 0.08     | 0.80   | 0.73  | RSD (%)         | 0.10     | 0.035  | 0.49  |         |
| Mass (mg)       | 15.03    |        |       | Mass (mg)       | 15.04    |        |       |         |
| Content         | 0.9718   |        |       | Content         | 0.9718   |        |       |         |
| Dilution        | 100      |        |       | Dilution        | 100      |        |       |         |
| [C] µg/mL       | 146      |        |       | [C] µg/mL       | 146      |        |       |         |

RT: retention time; TF: tail factor; P1 and P2: piperine standard solutions; SD: standard deviation; RSD: relative standard deviation; [C]: concentration
